# Supplementary material
Source: PubMed Central journal article supplement (PMC8632283)
Supplement: KAUP_A_1938913_SM3768.pdf [file KAUP_A_1938913_SM3768.pdf]

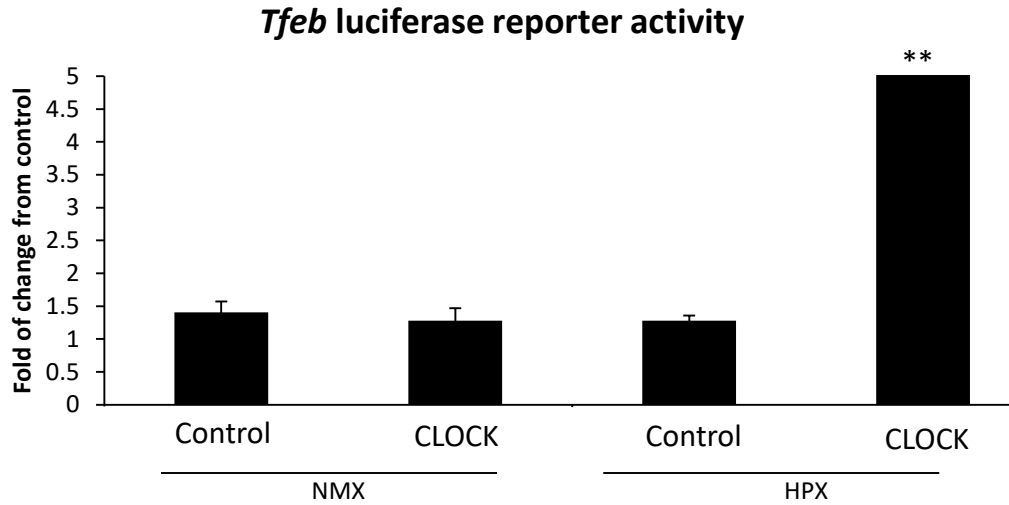

**Figure S1.** *Tfeb* promoter activation is dependent on CLOCK. *Tfeb* luciferase reporter activity in cardiac myocytes in the absence and presence of AdClock. Data are expressed as mean $\pm$  SE. Statistical significance is indicated: \*\*P<0.01.

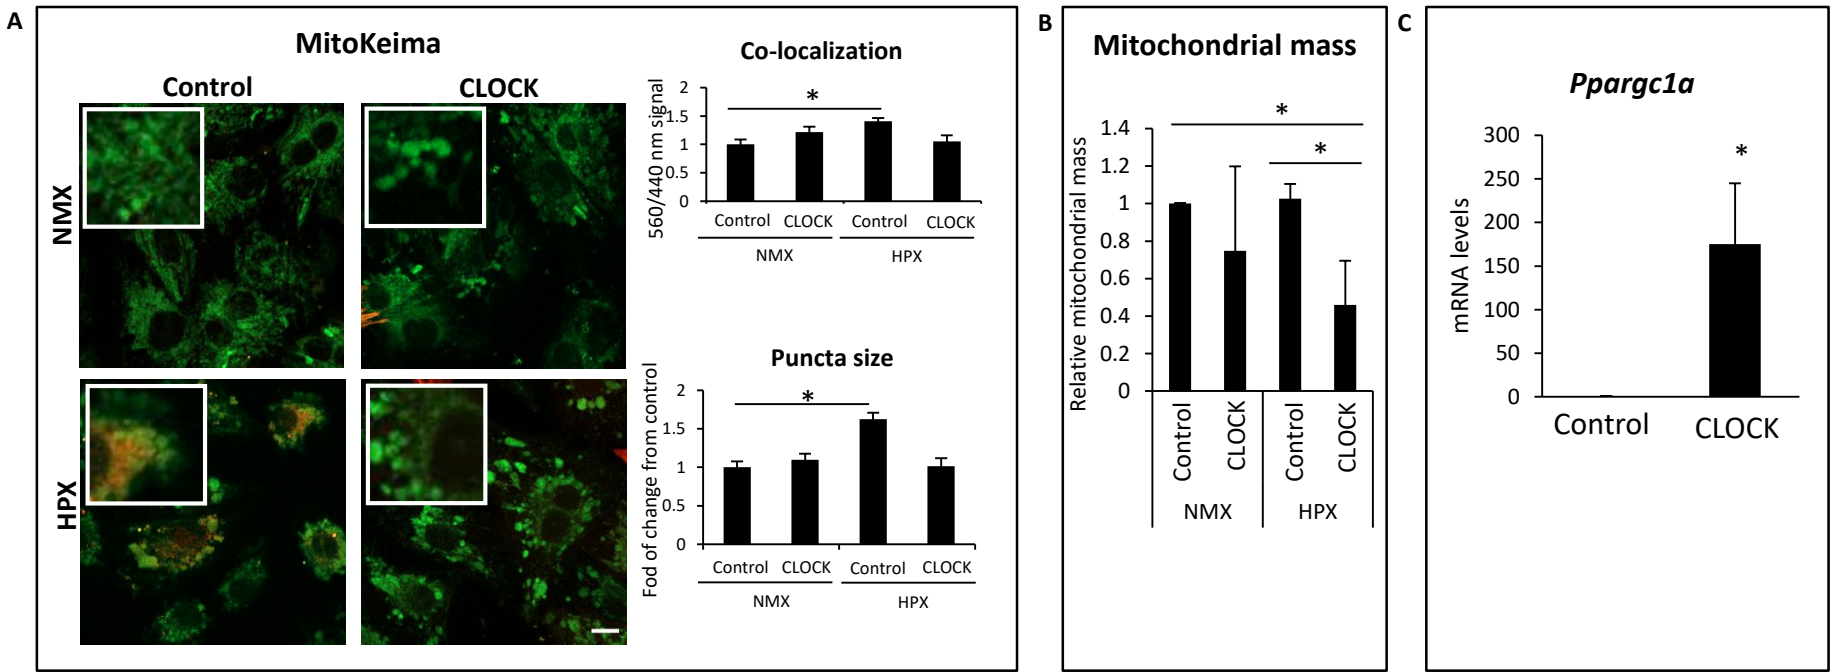

**Figure S2.** CLOCK restores mitochondrial autophagy and biogenesis. **(A)**, Left, representative images of MitoKeima staining, as an index of mitophagy in cardiac myocytes under normoxic (NMX) and hypoxic (HPX) conditions 18 h in the absence and presence of AdCMV or AdClock, bars: 10  $\mu$ m. Magnified regions are depicted by the white boxes, green fluorescent puncta demark mitochondria that are not fused with lysosomes (neutral pH), red/yellow fluorescent puncta demark mitochondria that have fused with lysosomes (acidic pH) indicative of mitophagy. Right, analysis of conditions tested on the left panel. **(B)**, Mitochondrial mass in cardiac myocytes under NMX or HPX conditions, viral control AdCMV or AdClock. **(C)**, mRNA levels of *PPARGC1A* in rat neonatal cardiac myocytes. Data are expressed as mean  $\pm$  SEM. \* $p < 0.05$ ,  $n = 3-4$  independent myocyte isolations.

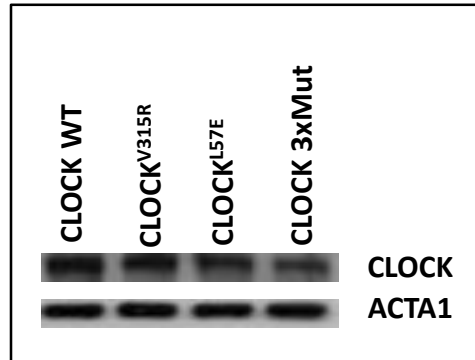

**Figure S3.** CLOCK protein expression levels. Top, western blot analysis of CLOCK protein expression in cells transfected with *Clock* WT or with CLOCK mutants designated as CLOCK<sup>V315R</sup>, CLOCK<sup>L57E</sup>, CLOCK 3xMut expression vectors; Bottom, ACTA1 expression levels for loading control.

**Table S1.** A partial list of genes altered in CLOCK  $\Delta 19/\Delta 19$  hearts by transcriptome analysis.

| Metabolic Process                                                               | Gene                                                                                                                                                                                                                            |
|---------------------------------------------------------------------------------|---------------------------------------------------------------------------------------------------------------------------------------------------------------------------------------------------------------------------------|
| OXPHOS<br>Complex I<br>Complex III<br>Complex IV<br>Complex V<br>OXPHOS related | <i>Ndufs1, Ndufa8, Ndufa4, Ndufb10, Ndufa3, Ndufb3, Ndufa4</i><br><i>Uqcrb, Uqcc2, Uqcrc2, Uqcrc1</i><br><i>Cox6a2, Cox4i2, Cox4i1, Cox7b, Cox7a2l, Cox6c</i><br><i>Atp5e, Atp5l, Atpif1</i><br><i>Coq5, Coq10b, Coq3, Coq9</i> |
| TCA cycle                                                                       | <i>Acot9, Acot1, Acot2, Acot13, Acot1, Idh2, Pdp2, Sucla2</i>                                                                                                                                                                   |
| Dynamics                                                                        | <i>Mtfp1, Mff, Prkn</i>                                                                                                                                                                                                         |

**Table S2.** Table of primer sequences.

| <b>Gene</b>                           | <b>Primer A</b>        | <b>Primer B</b>        |
|---------------------------------------|------------------------|------------------------|
| <i>Atg7</i> (Rat)                     | GCAGCCAGCAAGCGAAAG     | TTCATGACAACAAAGGTGTCAA |
| <i>Clock</i> (Mouse)                  | CTCCTCTAGAAGCTCACGAA   | GCTCCTAACTGAGCTGAAAA   |
| <i>Clock</i> $\Delta$ 19 (genotyping) | AGCACCTTCCTTTGCAGTTCG  | TGTGCTCAGACAGAATAAGTA  |
| <i>Clock</i> WT (genotyping)          | GGTCAAGGGCTACAGGTA     | -                      |
| Control (genotyping)                  | TGGGGTAAAAGACCTCTTGCC  | -                      |
| <i>Rpl32</i> (Rat+Mouse)              | TAAGCGAACTGGCGGAAAC    | GCTGCTCTTTCTACGATGGCTT |
| <i>Mfn2</i> (Rat+Mouse)               | CACAGAGCTGGACATCTGGA   | AGAGCCGCTCATTACCTTA    |
| <i>Opa1</i> (Rat+Mouse)               | ATACTGGGATCTGCTGTTGG   | AAGTCAGGCACAATCCACTT   |
| <i>Sqstm1</i> (Mouse)                 | AGAAGTGGACCCATCCACAG   | GAGAAACCCATGGACAGCAT   |
| <i>Rab7</i> (Mouse)                   | CTGCCTTCTGGTGTGTTGATGT | CTGGCCTGGATGAGAACTCG   |
| <i>siClock</i>                        | GGAGCCAUCCACCUAUGAATT  | UUCAUAGGUGGAUGGCUCCTT  |
| <i>scClock</i>                        | GGAACCUACCAUUGCGAATT   | UUCGCAAUGGGUAGGUUCCTT  |
| <i>Tfeb</i> (Mouse)                   | GCTACATATCAGCTCCAACC   | TTAGCTCTCGTTCTGAGTC    |
| <i>Tfeb</i> (Rat)                     | GACTCAGAAGCGAGAGCTAA   | GACTTCTGCAGGTCTTTCTG   |
| <i>Tfam</i> (Rat)                     | CCGAAGTGTTTTTCCAGCAT   | GGCTGCAATTTTCCTAACCA   |
